# Supplementary material for: JD419, a Staphylococcus aureus Phage With a Unique Morphology and Broad Host Range
Source: PubMed Central journal article supplement (PMC8100676; doi:10.3389/fmicb.2021.602902), 2021-04-22
Supplement: Image_1.pdf [file Image_1.pdf]

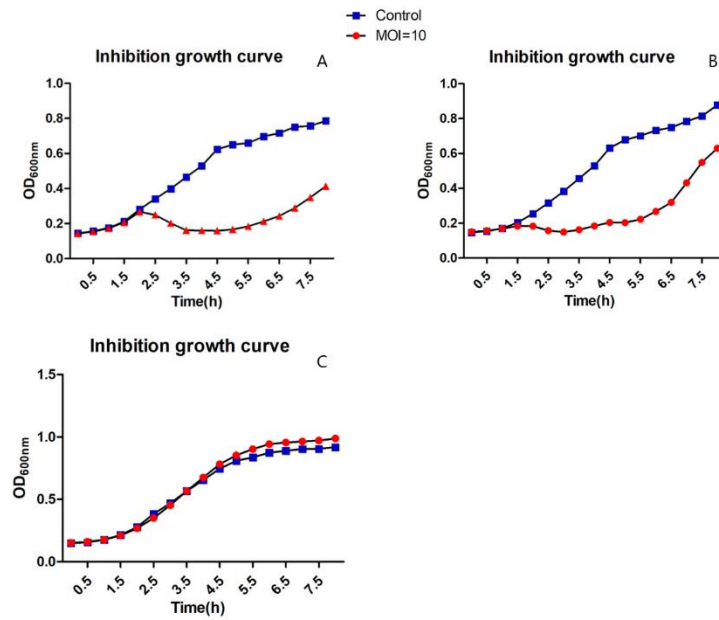

Fig. 1suppl. **Inhibition assays of *Staphylococcus* phage JD419.** The x-axis represents the co-culture time of phage JD419 and different strains of *S.aureus*, and the y-axis represents the change in OD<sub>600nm</sub> in the mixture of *Staphylococcus* phage JD419 infecting different strains at the MOI=10. A represents strain N315; B represents strain MR-84; C represents strain MS-57.
