# Supplementary material for: JD419, a Staphylococcus aureus Phage With a Unique Morphology and Broad Host Range
Source: PubMed Central journal article supplement (PMC8100676; doi:10.3389/fmicb.2021.602902), 2021-04-22
Supplement: Image_2.pdf [file Image_2.pdf]

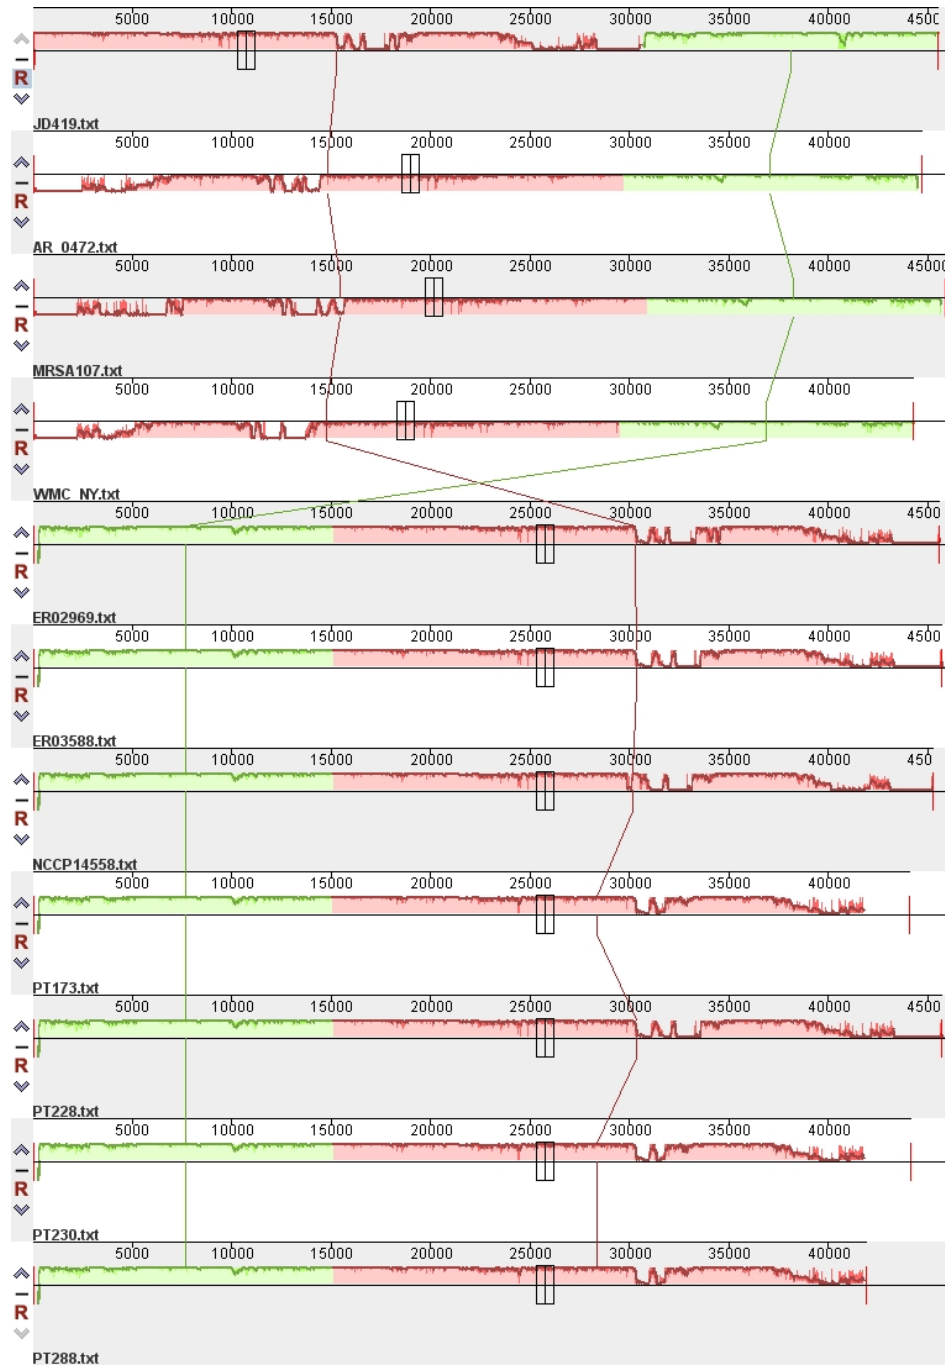

**Suppl.Fig.2. Comparative genomic analysis of *Staphylococcus* phage JD419 with prophages predicted in the corresponding *S.aureus* strain.** (Accession No. MRSA107: CP018629.1; PT288: CP049388.1; AR\_0472: CP029649.1; PT228: CP049486.1; ER02969: CP030658.1; ER03588: CP030595.1; NCCP14558: CP013953.1; PT173: CP049580.1; PT230: CP049482.1; WMC\_NY: CP063990.1).
